# Supplementary material for: Zinc-doped C4N3/BiOBr S-scheme heterostructured hollow spheres for efficient photocatalytic degradation of tetracycline
Source: Royal Society of Chemistry journal article supplement (doi:10.1039/d4cp01043d), 2024-01-01
Supplement: d4cp01043d1.pdf [file d4cp01043d1.pdf]

## Supporting Information

### **Zinc-doped C<sub>4</sub>N<sub>3</sub>/BiOBr S-scheme heterostructured hollow spheres for efficient photocatalytic degradation of tetracycline**

Yaqi Liu<sup>1,2</sup>, Guicheng Luo<sup>2,3</sup>, Yichen Liu<sup>1,2</sup>, Zuo Zheng Xu<sup>1,2</sup>,

Hengxin Shen<sup>2</sup>, Yuxiang Sheng<sup>2</sup>, Yuan Zhu<sup>2</sup>, Shuyi Wu<sup>4,\*</sup>, Lizhe Liu<sup>1,\*</sup>, Yun Shan<sup>2,\*</sup>

*<sup>1</sup>Key Laboratory of Modern Acoustics, MOE, Institute of Acoustics and Collaborative Innovation Center of Advanced Microstructures, National Laboratory of Solid State Microstructures, Nanjing University, Nanjing, 210093, China*

*<sup>2</sup>Nanjing Key Laboratory of Advanced Functional Materials, Nanjing Xiaozhuang University, Nanjing 211171, People's Republic of China*

*<sup>3</sup>School of Chemistry and Chemical Engineering, Nantong University, Nantong 226019, China*

*<sup>4</sup>Jiangsu Key Laboratory of Micro and Nano Heat Fluid Flow Technology and Energy Application, School of Physical Science and Technology, Suzhou University of Science and Technology, Suzhou, 215009, People's Republic China*

\*E-mail: [wsy@usts.edu.cn](mailto:wsy@usts.edu.cn) (S.Y. Wu), [lzliu@nju.edu.cn](mailto:lzliu@nju.edu.cn) (L.Z. Liu)

or [yshan@njxzc.edu.cn](mailto:yshan@njxzc.edu.cn) (Y. Shan)

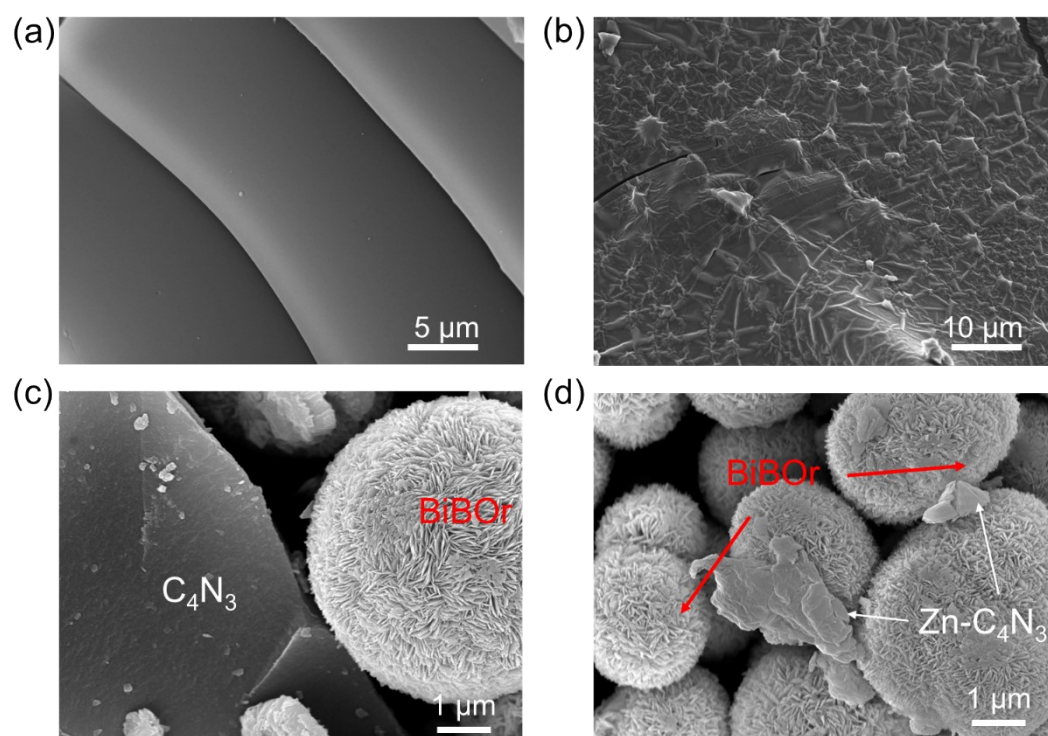

**Fig. S1.** SEM images of (a)  $C_4N_3$ , (b)  $Zn-C_4N_3$ , (c)  $C_4N_3/BiOBr$ , (d)  $Zn-C_4N_3/BiOBr$

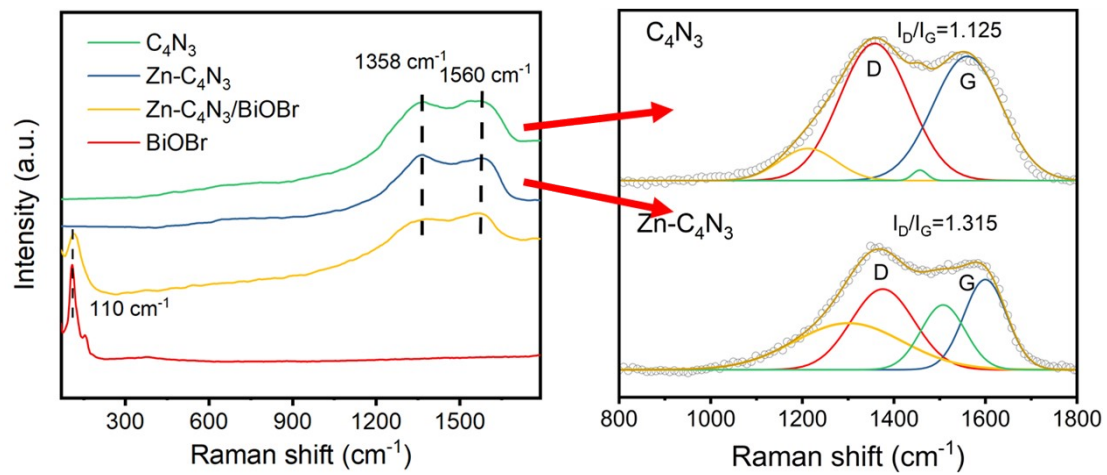

**Fig. S2.** Raman spectra of  $C_4N_3$ ,  $Zn-C_4N_3$ ,  $C_4N_3/BiOBr$  and  $Zn-C_4N_3/BiOBr$ .

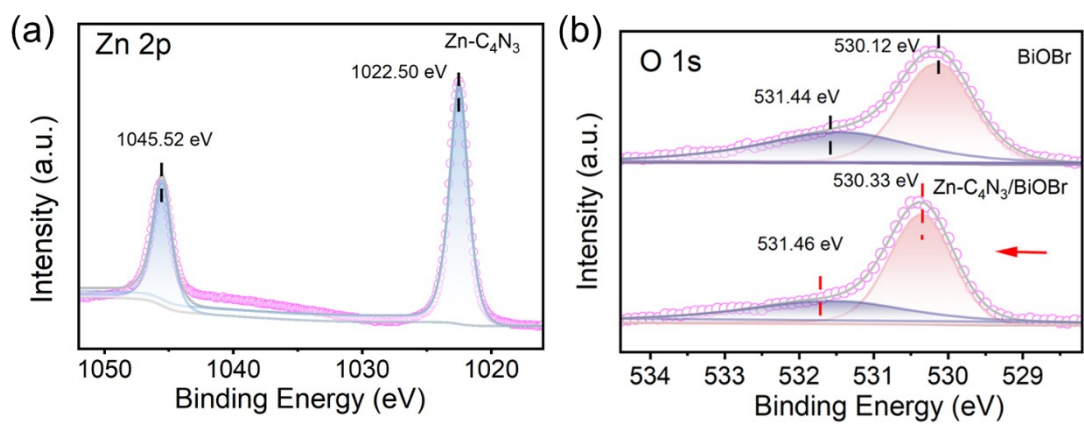

**Fig. S3.** (a) The Zn 2p XPS spectra of Zn-C<sub>4</sub>N<sub>3</sub>. (b) The O 1s XPS spectra of BiOBr and Zn-C<sub>4</sub>N<sub>3</sub>/BiOBr.

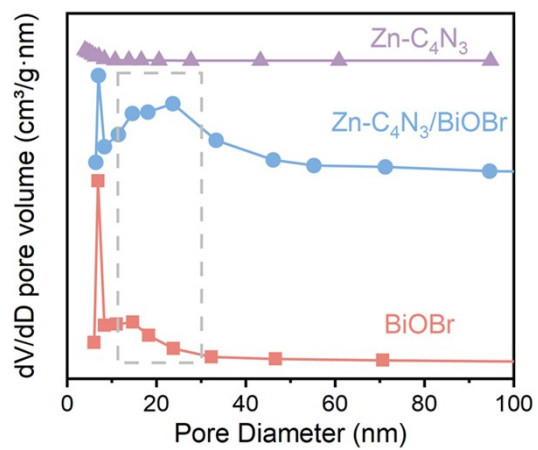

**Fig. S4.** Pore size distribution curves of BiOBr, Zn-C<sub>4</sub>N<sub>3</sub> and Zn-C<sub>4</sub>N<sub>3</sub>/BiOBr.

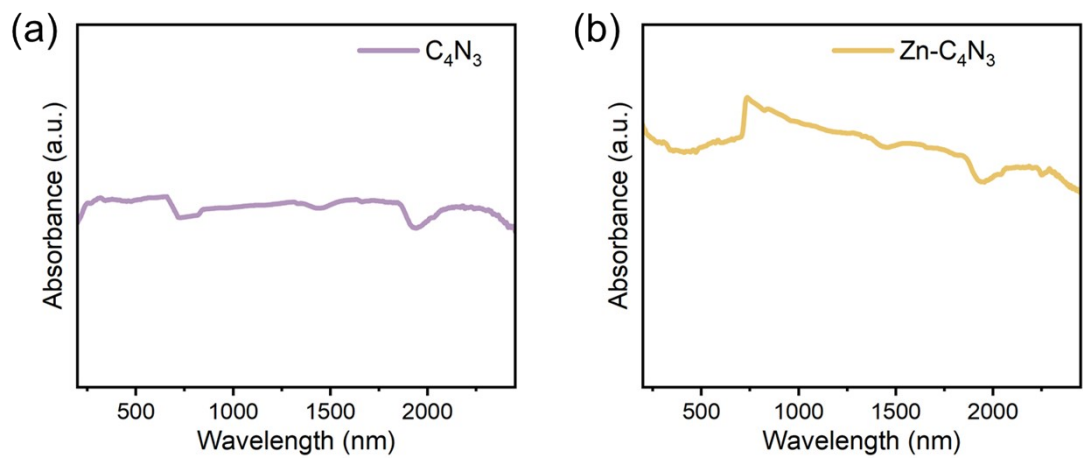

**Fig. S5.** UV-vis absorption spectra of  $C_4N_3$ ,  $Zn-C_4N_3$  in the range of 200-2500nm.

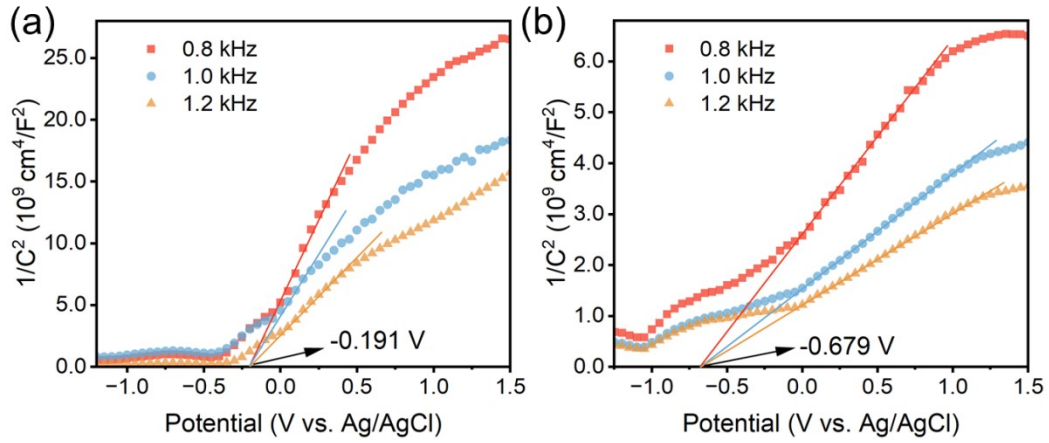

**Fig. S6.** Mott-Schottky curves of (a) BiOBr and (b) Zn-C<sub>4</sub>N<sub>3</sub>.

The flat band potential  $E_{FB}$  is determined by employing Mott-Schottky plots, which involves measuring the capacitance at frequencies of 800Hz, 1000Hz and 1200Hz under dark conditions at the solid-liquid interface. This determination is based on the relation between the inverse of the square of the capacitance and the potential, as described by the following equation <sup>1</sup>:

$$1/C^2 = 2(E_a - E_{FB} - \kappa T/e) / (eN\varepsilon_0\varepsilon_s A^2)$$

where  $C$  is the capacity pertaining to space charge,  $E_a$  is the applied potential,  $E_{FB}$  is the flat band potential that can be ascertained through the process of extrapolation to a capacitance of zero,  $\kappa$  is the Boltzmann constant,  $T$  is the absolute temperature,  $e$  is the electron charge,  $N$  is the density of carriers,  $\varepsilon_0$  is the electric permittivity of free space,  $\varepsilon_s$  is the dielectric constant of materials, and  $A$  is the area of electrode.

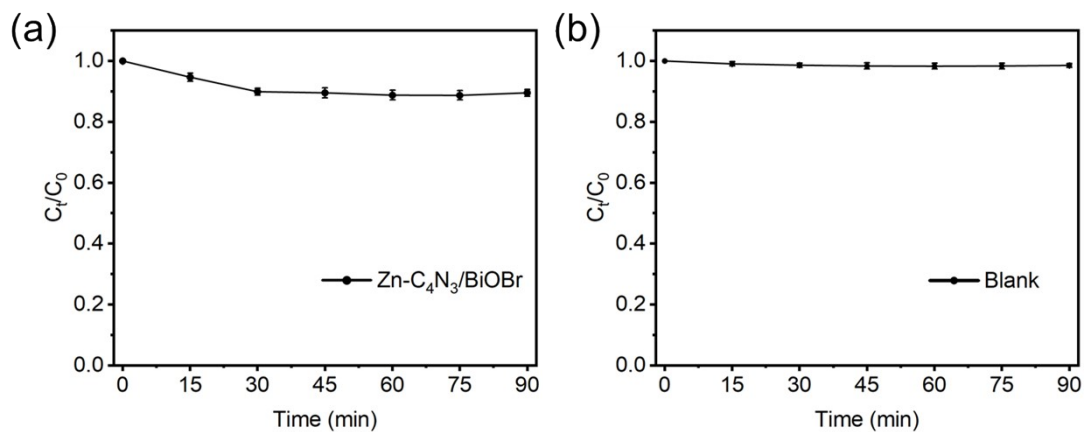

**Fig. S7.** (a) Degradation curve of TC under visible light irradiation for 90 min without the introduction of catalyst (TC: 25 mg/L). (b) Degradation curve of TC in the absence of light within 90 min (TC: 25 mg/L, Zn-C<sub>4</sub>N<sub>3</sub>/BiOBr: 20 mg).



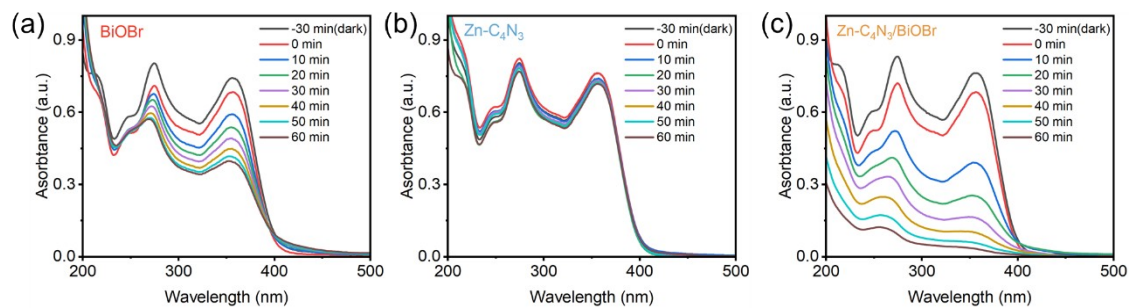

**Fig. S8.** The UV-Vis absorption spectra of degradation over (a) BiOBr (b) Zn-C<sub>4</sub>N<sub>3</sub> (c) Zn-C<sub>4</sub>N<sub>3</sub>/BiOBr.

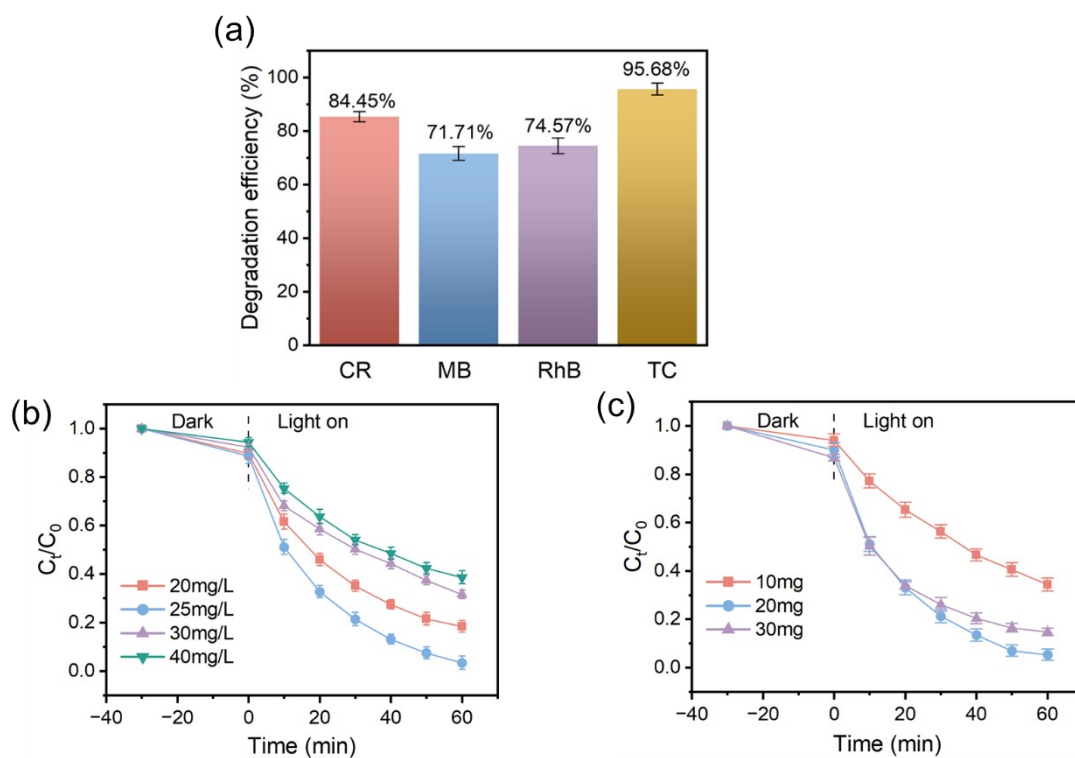

**Fig. S9.** (a) Photocatalytic degradation efficiency of different contaminants (CR, MB, RhB and TC) by Zn-C<sub>4</sub>N<sub>3</sub>/BiOBr. Effect of (b) initial TC concentration and (c) catalyst dosage over Zn-C<sub>4</sub>N<sub>3</sub>/BiOBr in degradation of TC.

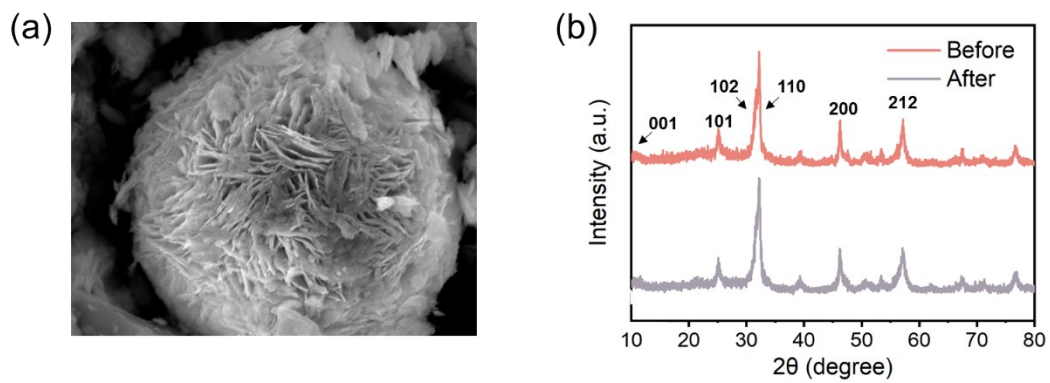

**Fig. S10.** (a) The SEM image and (b) XRD pattern of Zn-C<sub>4</sub>N<sub>3</sub>/BiOBr after cycling five times photocatalytic process.

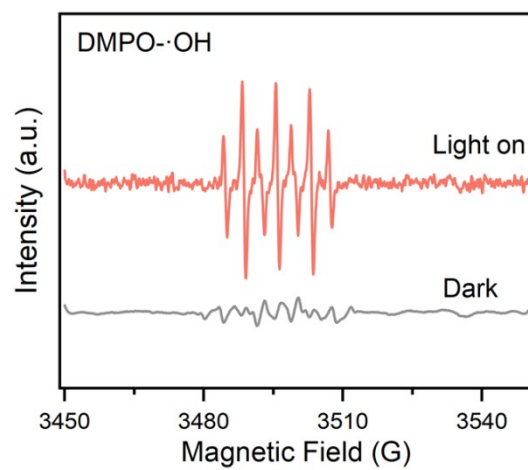

**Fig. S11.** ESR spectra of DMPO - •OH deionized water solution over Zn-C<sub>4</sub>N<sub>3</sub>/BiOBr after irradiation.

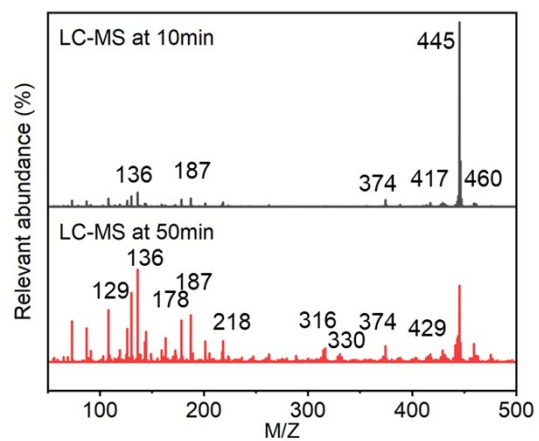

**Fig. S12.** Mass spectra of TC and intermediates obtained after degradation at 10min and 50min under visible light irradiation.

The curves of time-resolved PL spectra are fitted by a biexponential function. The fitting equation is as follows <sup>2</sup>:

$$\Delta R/R_0(t) = A_1 \exp(-t/\tau_1) + A_2 \exp(-t/\tau_2)$$

where parameters  $\tau_1$  and  $\tau_2$  are the carrier lifetimes, and  $A_1$  and  $A_2$  are the corresponding proportion.

The fitting of photoluminescence decay profiles was conducted. A double exponential model was employed to fit the decay profiles of the prepared samples. The equation used to calculate the average lifetime of photogenerated carriers is as follows :

$$\tau_{av} = (A_1 \cdot \tau_1^2 + A_2 \cdot \tau_2^2) / (A_1 \cdot \tau_1 + A_2 \cdot \tau_2)$$

where parameters  $\tau_{av}$ ,  $\tau_1$  and  $\tau_2$  are the carrier lifetimes, and  $A_1$  and  $A_2$  are the corresponding proportion.

**Table S1.** Parameters and the calculated decay times of  $A$ ,  $t$  and  $\tau$  via bi-exponential decay fitting for Zn-C<sub>4</sub>N<sub>3</sub>, BiOBr and Zn-C<sub>4</sub>N<sub>3</sub>/BiOBr.

| Sample                                     | $\tau_1$ (ns) | $A_1$ | $\tau_2$ (ns) | $A_2$ | $\tau_{av}$ (ns) | $K$ (ns <sup>-1</sup> ) |
|--------------------------------------------|---------------|-------|---------------|-------|------------------|-------------------------|
| <b>BiOBr</b>                               | 1.38          | 456.8 | 12.06         | 65.0  | 7.30             | 0.137                   |
| <b>Zn-C<sub>4</sub>N<sub>3</sub>/BiOBr</b> | 0.62          | 383.3 | 4.43          | 131.2 | 3.33             | 0.300                   |

**Table S2.** The reaction rate and degradation efficiency of TC degradation by different catalysts.

| Catalyst                                     | TC concentration | Reaction time | Reaction rate                             | Degradation efficiency | Refs.     |
|----------------------------------------------|------------------|---------------|-------------------------------------------|------------------------|-----------|
| Zn-C <sub>4</sub> N <sub>3</sub> /BiOBr      | 25 mg/L          | 60 min        | 4.96×10 <sup>-2</sup> min <sup>-1</sup>   | 95.70%                 | This work |
| BT/BiOBr/Bi                                  | 20 mg/L          | 120 min       | 1.5×10 <sup>-2</sup> min <sup>-1</sup>    | 93%                    | 3         |
| ZnO/BiOBr                                    | 20 mg/L          | 90 min        | 1.03×10 <sup>-2</sup> min <sup>-1</sup>   | 86.76%                 | 4         |
| 5NCDs/BiOBr                                  | 20 mg/L          | 60 min        | 4.2×10 <sup>-2</sup> min <sup>-1</sup>    | 92%                    | 5         |
| BiOBr/Bi <sub>2</sub> WO <sub>6</sub> -0.2   | 20 mg/L          | 60 min        | 3.49 ×10 <sup>-2</sup> min <sup>-1</sup>  | 88.06%                 | 6         |
| BiVO <sub>4</sub> /BiOBr                     | 10 mg/L          | 140 min       | 1.59 ×10 <sup>-2</sup> min <sup>-1</sup>  | 90.4%                  | 7         |
| 12%Zn-BiOBr                                  | 50 mg/L          | 180 min       | 0.28 ×10 <sup>-2</sup> min <sup>-1</sup>  | 50.36%                 | 8         |
| NiTiO <sub>3</sub> -BiOBr                    | 40 mg/L          | 180 min       | /                                         | 73.5%                  | 9         |
| 20% Ni doped SnS <sub>2</sub> /BiOBr         | 15 mg/L          | 70 min        | 4.88 ×10 <sup>-2</sup> min <sup>-1</sup>  | 96.18%                 | 10        |
| Ag <sub>3</sub> PO <sub>4</sub> @MWCN Ts@PPy | 20 mg/L          | 6 min         | 1.67 min <sup>-1</sup>                    | 100%                   | 11        |
| Fe-N/C+PMS                                   | 11.1 mg/L        | 30 min        | 2.12 × 10 <sup>-1</sup> min <sup>-1</sup> | 100%                   | 12        |

**Table S3.** Fukui index of TC.

| Atom   | q(N)    | q(N+1)  | q(N-1)  | f <sup>-</sup> | f <sup>+</sup> | f <sup>0</sup> |
|--------|---------|---------|---------|----------------|----------------|----------------|
| 1 (C)  | -0.0721 | -0.1011 | -0.0428 | 0.0293         | 0.0290         | 0.0291         |
| 2 (C)  | -0.0287 | -0.0832 | 0.0035  | 0.0322         | 0.0545         | 0.0434         |
| 3 (C)  | -0.0568 | -0.0796 | -0.0145 | 0.0424         | 0.0228         | 0.0326         |
| 4 (C)  | 0.0097  | -0.0157 | 0.0180  | 0.0083         | 0.0254         | 0.0169         |
| 5 (C)  | -0.0327 | -0.0456 | -0.0115 | 0.0212         | 0.0129         | 0.0170         |
| 6 (C)  | 0.0909  | 0.0658  | 0.1220  | 0.0311         | 0.0251         | 0.0281         |
| 7 (C)  | 0.0883  | 0.0866  | 0.0893  | 0.0010         | 0.0016         | 0.0013         |
| 8 (C)  | -0.0267 | -0.0292 | -0.0213 | 0.0054         | 0.0025         | 0.0039         |
| 9 (C)  | -0.0648 | -0.0804 | -0.0207 | 0.0442         | 0.0155         | 0.0299         |
| 10 (C) | 0.1303  | 0.0638  | 0.1392  | 0.0089         | 0.0665         | 0.0377         |
| 11 (C) | -0.0567 | -0.0618 | -0.0510 | 0.0057         | 0.0051         | 0.0054         |
| 12 (C) | -0.0193 | -0.0207 | -0.0169 | 0.0023         | 0.0014         | 0.0019         |
| 13 (C) | 0.0698  | 0.0624  | 0.0765  | 0.0066         | 0.0074         | 0.0070         |
| 14 (C) | 0.1029  | 0.0572  | 0.1253  | 0.0224         | 0.0457         | 0.0340         |
| 15 (C) | 0.0264  | 0.0205  | 0.0347  | 0.0084         | 0.0059         | 0.0071         |
| 16 (C) | 0.1085  | 0.0631  | 0.1162  | 0.0077         | 0.0454         | 0.0266         |
| 17 (C) | -0.0797 | -0.0972 | -0.0640 | 0.0157         | 0.0175         | 0.0166         |
| 18 (C) | 0.1351  | 0.1114  | 0.1471  | 0.0120         | 0.0236         | 0.0178         |
| 19 (O) | -0.1713 | -0.1896 | -0.1247 | 0.0466         | 0.0183         | 0.0325         |
| 20 (O) | -0.2350 | -0.3077 | -0.2094 | 0.0256         | 0.0727         | 0.0491         |
| 21 (O) | -0.1723 | -0.2132 | -0.1281 | 0.0442         | 0.0409         | 0.0425         |
| 22 (O) | -0.2422 | -0.2824 | -0.1968 | 0.0454         | 0.0402         | 0.0428         |
| 23 (O) | -0.2190 | -0.2406 | -0.2038 | 0.0152         | 0.0215         | 0.0184         |
| 24 (C) | 0.1736  | 0.1558  | 0.1819  | 0.0082         | 0.0179         | 0.0131         |
| 25 (N) | -0.1445 | -0.1585 | -0.1328 | 0.0118         | 0.0140         | 0.0129         |
| 26 (O) | -0.2654 | -0.2993 | -0.2352 | 0.0302         | 0.0340         | 0.0321         |
| 27 (O) | -0.1618 | -0.1957 | -0.1498 | 0.0120         | 0.0339         | 0.0230         |
| 28 (N) | -0.0908 | -0.0939 | -0.0127 | 0.0781         | 0.0031         | 0.0406         |
| 29 (C) | -0.0446 | -0.0482 | -0.0279 | 0.0167         | 0.0037         | 0.0102         |
| 30 (C) | -0.0418 | -0.0473 | -0.0231 | 0.0187         | 0.0054         | 0.0121         |
| 31 (O) | -0.2194 | -0.2311 | -0.2092 | 0.0102         | 0.0117         | 0.0110         |
| 32 (C) | -0.0935 | -0.0994 | -0.0889 | 0.0046         | 0.0059         | 0.0052         |
| 33 (H) | 0.0417  | 0.0200  | 0.0616  | 0.0199         | 0.0217         | 0.0208         |
| 34 (H) | 0.0489  | 0.0212  | 0.0698  | 0.0208         | 0.0277         | 0.0243         |
| 35 (H) | 0.0407  | 0.0234  | 0.0590  | 0.0183         | 0.0172         | 0.0178         |
| 36 (H) | 0.0281  | 0.0189  | 0.0409  | 0.0128         | 0.0092         | 0.0110         |
| 37 (H) | 0.0279  | 0.0214  | 0.0366  | 0.0087         | 0.0064         | 0.0076         |
| 38 (H) | 0.0258  | 0.0134  | 0.0340  | 0.0081         | 0.0125         | 0.0103         |
| 39 (H) | 0.0316  | 0.0267  | 0.0359  | 0.0043         | 0.0049         | 0.0046         |
| 40 (H) | 0.0455  | 0.0327  | 0.0557  | 0.0102         | 0.0127         | 0.0115         |
| 41 (H) | 0.1815  | 0.1638  | 0.2023  | 0.0208         | 0.0177         | 0.0192         |
| 42 (H) | 0.1378  | 0.1243  | 0.1495  | 0.0118         | 0.0135         | 0.0126         |
| 43 (H) | 0.1677  | 0.1568  | 0.1779  | 0.0102         | 0.0109         | 0.0105         |
| 44 (H) | 0.1323  | 0.1159  | 0.1466  | 0.0143         | 0.0164         | 0.0154         |
| 45 (H) | 0.1292  | 0.1202  | 0.1350  | 0.0058         | 0.0090         | 0.0074         |
| 46 (H) | 0.1386  | 0.1268  | 0.1480  | 0.0094         | 0.0118         | 0.0106         |
| 47 (H) | 0.0330  | 0.0329  | 0.0441  | 0.0111         | 0.0002         | 0.0056         |
| 48 (H) | 0.0354  | 0.0237  | 0.0548  | 0.0194         | 0.0117         | 0.0155         |
| 49 (H) | 0.0136  | 0.0073  | 0.0417  | 0.0281         | 0.0064         | 0.0172         |
| 50 (H) | 0.0354  | 0.0302  | 0.0508  | 0.0154         | 0.0052         | 0.0103         |
| 51 (H) | 0.0315  | 0.0202  | 0.0518  | 0.0203         | 0.0113         | 0.0158         |
| 52 (H) | 0.0185  | 0.0108  | 0.0476  | 0.0291         | 0.0077         | 0.0184         |
| 53 (H) | 0.1589  | 0.1484  | 0.1663  | 0.0074         | 0.0105         | 0.0089         |
| 54 (H) | 0.0354  | 0.0340  | 0.0383  | 0.0028         | 0.0014         | 0.0021         |
| 55 (H) | 0.0349  | 0.0231  | 0.0456  | 0.0107         | 0.0117         | 0.0112         |
| 56 (H) | 0.0298  | 0.0186  | 0.0377  | 0.0078         | 0.0113         | 0.0095         |



**Table S4.** Intermediates of TC identified by LC-MS within 10 min and 50 min.

| Structure NO. | Molecular Formula    | M/Z | Probable Structure                                                                    |
|---------------|----------------------|-----|---------------------------------------------------------------------------------------|
| TC            | $C_{22}H_{24}N_2O_8$ | 445 | 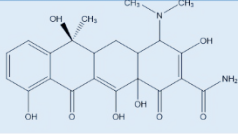   |
| P1            | $C_{22}H_{24}N_2O_9$ | 460 |    |
| P2            | $C_{19}H_{19}NO_7$   | 374 |    |
| P3            | $C_{10}H_{10}O_3$    | 178 |    |
| P4            | $C_9H_{14}O_4$       | 187 |   |
| P5            | $C_{20}H_{20}N_2O_8$ | 417 |  |
| P6            | $C_{19}H_{22}O_5$    | 330 |  |
| P7            | $C_9H_{12}O$         | 136 |  |
| P8            | $C_{22}H_{24}N_2O_7$ | 429 |  |
| P9            | $C_{18}H_{20}O_5$    | 316 |  |
| P10           | $C_{13}H_{14}O_3$    | 218 |  |
| P11           | $C_8H_{16}O$         | 129 |  |

## References

- (1) Men, X.; Shan, Y.; Xu, Z.; Liu, L.; Wu, X. Multi-electron-channel integration to accelerate photogenerated carrier reaction kinetics for efficient sulfadiazine degradation. *Applied Catalysis A: General*. **2022**, *633*, 118513. DOI: 10.1016/j.apcata.2022.118513.
- (2) Wu, Q.; Ma, H.; Wang, Y.; Chen, J.; Dai, J.; Xu, X.; Wu, X. Surface Electron Localization in Cu-MOF-Bonded Double-Heterojunction Cu<sub>2</sub>O Induces Highly Efficient Photocatalytic CO<sub>2</sub> Reduction. *ACS Appl Mater Interfaces*. **2022**, *14* (48), 54328-54337. DOI: 10.1021/acsami.2c15278.
- (3) Sun, J.; He, M.; Zhang, J.; Fu, T.; Huang, G.; Wang, L.; Liu, K.; Tong, Z.; Zhang, H. Insight into the synergistic effect of metal surface plasmon resonance and clay loading to boost the antibiotics degradation of Bentonite/BiOBr/bismuth. *Materials Science in Semiconductor Processing*. **2023**, *166*, 107739. DOI: 10.1016/j.mssp.2023.107739.
- (4) Zhang, S.; Zhao, M.; Xu, C.; Mo, S.; He, J.; Long, F. Core-shell ZnO/BiOBr p-n heterojunction with excellent photocatalytic performance in degradation of tetracycline hydrochloride. *Materials Research Bulletin*. **2024**, *170*, 112545. DOI: 10.1016/j.materresbull.2023.112545.
- (5) Chen, J.; zhang, Y.; Li, X.; Wang, Y.; Ma, C.; Guo, M. Ultrathin NCDs/BiOBr with oxygen vacancies for efficient photocatalytic degradation of tetracyclines: Revealing the triple role of NCDs in the synthesis. *Colloids and Surfaces A: Physicochemical and Engineering Aspects*. **2023**, *676*, 132276. DOI: 10.1016/j.colsurfa.2023.132276.
- (6) Tang, D.; Chen, X.; Yan, J.; Xiong, Z.; Lou, X.; Ye, C.; Chen, J.; Qiu, T. Facile one-pot synthesis of a BiOBr/Bi<sub>2</sub>WO<sub>6</sub> heterojunction with enhanced visible-light photocatalytic activity for tetracycline degradation. *Chinese Journal of Chemical Engineering*. **2023**, *53*, 222-231. DOI: 10.1016/j.cjche.2022.02.018.
- (7) Singla, S.; Devi, P.; Basu, S. Revolutionizing the Role of Solar Light Responsive BiVO<sub>4</sub>/BiOBr Heterojunction Photocatalyst for the Photocatalytic Deterioration of Tetracycline and Photoelectrocatalytic Water Splitting. *Materials (Basel)*. **2023**, *16*, 5661. DOI: 10.3390/ma16165661.
- (8) Zhang, J.; Jin, Y.; Zhang, Y.; Zhang, J.; Liu, Z.; Cai, Y.; Zhang, S.; Fang, M.; Kong, M.; Tan, X. The effect of internal stress on the photocatalytic performance of the Zn doped BiOBr

photocatalyst for tetracycline degradation. *Journal of the Taiwan Institute of Chemical Engineers*. **2023**, *143*, 104710. DOI: 10.1016/j.jtice.2023.104710.

(9) Sun, K.; Li, M.; Zhou, H.; Ma, X.; Li, W. Porous Rod-like NiTiO<sub>3</sub>-BiOBr Heterojunctions with Highly Improved Visible-Light Photocatalytic Performance. *Materials (Basel)*. **2023**, *16*, 5033. DOI: 10.3390/ma16145033.

(10) Li, Q.; Wang, L.; Song, J.; Huang, Y.; Xie, G.; Liu, Y.; Li, H. Novel 2D/2D S-scheme Ni doped SnS<sub>2</sub>/BiOBr heterostructures with enhanced photocatalytic activity. *Arabian Journal of Chemistry*. **2023**, *16*, 105081. DOI: 10.1016/j.arabjc.2023.105081.

(11) Lin, Y.; Wu, X.; Han, Y.; Yang, C.; Ma, Y.; Du, C.; Teng, Q.; Liu, H.; Zhong, Y. Spatial separation of photogenerated carriers and enhanced photocatalytic performance on Ag<sub>3</sub>PO<sub>4</sub> catalysts via coupling with PPy and MWCNTs. *Applied Catalysis B: Environmental* **2019**, *258*. DOI: 10.1016/j.apcatb.2019.117969.

(12) Wu, S.; Yang, Z.; Zhou, Z.; Li, X.; Lin, Y.; Cheng, J. J.; Yang, C. Catalytic activity and reaction mechanisms of single-atom metals anchored on nitrogen-doped carbons for peroxymonosulfate activation. *J Hazard Mater* **2023**, *459*, 132133. DOI: 10.1016/j.jhazmat.2023.132133.
